# Supplementary material for: PFKFB3 Inhibitor 3PO Reduces Cardiac Remodeling after Myocardial Infarction by Regulating the TGF-β1/SMAD2/3 Pathway
Source: MDPI journal article supplement (doi:10.3390/biom13071072), 2023-07-03

## Supplemental Material:

### PFKFB3 inhibitor 3PO reduces cardiac remodeling after myocardial

### infarction by regulating the TGF- $\beta$ 1/SMAD2/3 pathway.

Qian Yang 1,2,<sup>†</sup>, Xiao Zong 1,2,<sup>†</sup>, Lingfang Zhuang 1,2, Roubai Pan 1, Xierenayi Tudi 1,2, Qin Fan 1,<sup>\*</sup>, and  
Rong Tao 1,<sup>\*</sup>

Table S1. List of the antibodies and other reagents used in this study.

| Antibody specificity                       | Company                   | Cat. No.   | Application | Dilution |
|--------------------------------------------|---------------------------|------------|-------------|----------|
| <b>Mouse antibody for Western Blot</b>     |                           |            |             |          |
| PFKFB3                                     | abcam                     | ab181861   | WB          | 1:1000   |
| GAPDH                                      | Proteintech               | 60004-1-1g | WB          | 1:3000   |
| P-SMAD2                                    | Cell Signaling Technology | 18338      | WB          | 1:1000   |
| SMAD2                                      | Cell Signaling Technology | 5339       | WB          | 1:1000   |
| P-SMAD3                                    | abcam                     | ab52903    | WB          | 1:1000   |
| SMAD3                                      | abcam                     | ab40854    | WB          | 1:1000   |
| SMAD7                                      | Santa Cruz Biotechnology  | Sc-365846  | WB          | 1:1000   |
| TGF- $\beta$                               | abcam                     | ab179695   | WB          | 1:1000   |
| <b>Secondary antibody for Western Blot</b> |                           |            |             |          |
| Anti-rabbit                                | Cell Signaling Technology | 7074       | WB          | 1:3000   |
| Anti-mouse                                 | Cell Signaling Technology | 7076       | WB          | 1:3000   |
| <b>Mouse antibody for IF</b>               |                           |            |             |          |
| PFKFB3                                     | Proteintech               | 13763-1-AP | IF          | 1:100    |
| COL-1                                      | abcam                     | ab34710    | IF          | 1:100    |
| COL-3                                      | abcam                     | ab7778     | IF          | 1:100    |
| FN                                         | abcam                     | ab2413     | IF          | 1:100    |
| VIMENTIN                                   | Servicebio                | GB12192    | IF          | 1:100    |
| DAPI                                       | Beyotime Biotechnology    | C1006      | IF          | 1:1000   |
| $\alpha$ -SMA                              | abcam                     | ab28052    | IF          | 1:100    |
| $\alpha$ -actinin                          | Servicebio                | GB11555    | IF          | 1:500    |
| Gr-1                                       | Servicebio                | GB11229    | IF          | 1:200    |
| Isolectin B4                               | Vector                    | B-1205     | IF          | 1:100    |

| <b>Rat antibody for IF</b>                                                       |                           |            |                     |            |
|----------------------------------------------------------------------------------|---------------------------|------------|---------------------|------------|
| PFKFB3                                                                           | Proteintech               | 13763-1-AP | IF                  | 1:100      |
| $\alpha$ -SMA                                                                    | abcam                     | ab28052    | IF                  | 1:100      |
| DAPI                                                                             | Beyotime<br>Biotechnology | C1006      | IF                  | 1:1000     |
| <b>Secondary antibody conjugated with fluorescence</b>                           |                           |            |                     |            |
| Goat anti-Rabbit Secondary Antibody-Alexa Fluor® 488                             | Thermo Fisher             | A11034     | IF                  | 1:1000     |
| Goat anti-Rabbit Secondary Antibody-Alexa Fluor® 555                             | Thermo Fisher             | A21428     | IF                  | 1:1000     |
| Goat anti-Mouse Secondary Antibody-Alexa Fluor® 488                              | Thermo Fisher             | A11001     | IF                  | 1:1000     |
| Goat anti-Mouse Secondary Antibody-Alexa Fluor® 488                              | Thermo Fisher             | A21422     | IF                  | 1:1000     |
| <b>PFKFB3 inhibitor and vector used in mouse</b>                                 |                           |            |                     |            |
| 3PO                                                                              | MCE                       | HY-19824   | inhibitor           | 3.5mg/ml   |
| DMSO                                                                             | MCE                       | HY-Y0320   | vector              | 5:7        |
| <b>PFKFB3 inhibitor, Rat Recombinant protein, and their vectors used in cell</b> |                           |            |                     |            |
| 3PO                                                                              | MCE                       | HY-19824   | inhibitor           | 30 $\mu$ M |
| DMSO                                                                             | MCE                       | HY-Y0320   | vector              | 1:1000     |
| Recombinant Human TGF- $\beta$ Protein                                           | RD                        | 240-B-002  | Recombinant protein | 20ng/ml    |
| Reconstitution (BSA/HCl)                                                         | Buffer 4 RD               | RB04       | vector              | 1:1        |

**Table S2. Echocardiographic analysis of DMSO and 3PO mice at days 14 and 28 after MI or sham surgery.**

| Group                 | SHAM              |                   | MI-D14             |                     | MI-D28             |                               |
|-----------------------|-------------------|-------------------|--------------------|---------------------|--------------------|-------------------------------|
|                       | DMSO              | 3PO               | DMSO               | 3PO                 | DMSO               | 3PO                           |
| n                     | 13                | 12                | 13                 | 10                  | 12                 | 11                            |
| HR(beats/min)         | 471.26 $\pm$ 4.43 | 467.26 $\pm$ 4.00 | 472.3 $\pm$ 4.49   | 491.88 $\pm$ 5.13   | 481.00 $\pm$ 4.79  | 485.35 $\pm$ 4.65             |
| EF(%)                 | 53.80 $\pm$ 1.38  | 56.78 $\pm$ 1.88  | 19.83 $\pm$ 3.14   | 46.31 $\pm$ 3.42*** | 20.01 $\pm$ 3.71   | 33.39 $\pm$ 3.94**            |
| FS(%)                 | 27.19 $\pm$ 0.83  | 29.27 $\pm$ 1.23  | 9.17 $\pm$ 1.54    | 23.21 $\pm$ 2.09*** | 9.36 $\pm$ 1.83    | 15.97 $\pm$ 2.12 <sup>#</sup> |
| Corrected LV mass(mg) | 82.3 $\pm$ 3.00   | 90.46 $\pm$ 2.93  | 67.31 $\pm$ 7.23   | 70.14 $\pm$ 6.54    | 62.23 $\pm$ 4.09   | 66.67 $\pm$ 5.51              |
| LV Vol ; d( $\mu$ l)  | 53.31 $\pm$ 2.12  | 56.67 $\pm$ 2.39  | 126.75 $\pm$ 10.65 | 71.37 $\pm$ 3.22*** | 133.10 $\pm$ 11.88 | 80.49 $\pm$ 9.81***           |
| LV Vol ; s( $\mu$ l)  | 24.8 $\pm$ 1.45   | 24.45 $\pm$ 1.37  | 99.08 $\pm$ 12.63  | 34.5 $\pm$ 2.69***  | 110.01 $\pm$ 13.47 | 55.49 $\pm$ 9.56***           |
| LVPW; d(mm)           | 0.73 $\pm$ 0.03   | 0.72 $\pm$ 0.02   | 0.29 $\pm$ 0.03    | 0.61 $\pm$ 0.04***  | 0.34 $\pm$ 0.04    | 0.57 $\pm$ 0.08**             |
| IVS; d(mm)            | 0.93 $\pm$ 0.02   | 1.01 $\pm$ 0.04   | 0.54 $\pm$ 0.03    | 0.74 $\pm$ 0.03***  | 0.46 $\pm$ 0.03    | 0.61 $\pm$ 0.05**             |

Data are expressed as mean  $\pm$  SEM and analyzed using the two-way ANOVA test. \*Statistical difference between DMSO and

3PO at day 14 after MI. \* P<0.05. \*\* P<0.01. \*\*\* P<0.001. \*Statistical difference between DMSO and 3PO at day 14 after MI. \*P<0.05. \*\*P<0.01. \*\*\*P<0.001.

DMSO= Dimethylsulfoxide; 3PO= 3-(3-pyridinyl)-1-(4-pyridinyl)-2-propen-1-one; MI= myocardial infarction; HR=heart rate; EF= ejection fraction; FS= fractional shortening; LV Vol ; d= left ventricular end-diastolic volume; LV Vol ; s= left ventricular end-systolic volume; LVPW; d= left ventricular posterior wall thickness at diastole; IVS; d= interventricular septum thickness at diastole.

**Table S3. Primers for real-time PCR analysis in mice and cells.**

| GENE                     | Forward                | Reverse                 |
|--------------------------|------------------------|-------------------------|
| <b>Primers for mice</b>  |                        |                         |
| Pfkfb3                   | CAACTCCCCAACCGTGATTGT  | GAGGTAGCGAGTCAGCTTCTT   |
| Gapdh                    | AGGTCGGTGTGAACGGATTTG  | TGTAGACCATGTAGTTGAGGTCA |
| Col1a1                   | GCTCCTCTTAGGGGCCACT    | CCACGTCTCACCATTGGGG     |
| Col3a1                   | ACGTAGATGAATTGGGATGCAG | GGGTGGGGCAGTCTAGTG      |
| Fibronectin              | GCTCAGCAAATCGTGCAGC    | CTAGGTAGGTCCGTTCCCACT   |
| <b>Primers for NRCFs</b> |                        |                         |
| Pfkfb3                   | CGGACAACCTTTGCTAGGGA   | TTCTGGGAAGATTCGGCACC    |
| Gapdh                    | ATGGGAAGCTGGTCATCAAC   | GTGGTTCACACCCATCACAA    |

**Figure S1. 3PO has no impact on the ratio of heart weight to body weight, cardiomyocyte apoptosis, or angiogenesis after MI.** (A) Summarized data of heart weight/body weight (HW/BW) for sham- and MI-operated mice at day 28 after surgery (n=3-5). (B) and (D) The TUNEL assay (red),  $\alpha$ -actinin (green), and DAPI (blue) immunofluorescence co-staining were used to determine cardiomyocyte apoptosis in infarct areas and border areas between DMSO and 3PO mice at day 1 after MI (n=3; scale bar, 20  $\mu$ m). (C) and (E) Representative immunofluorescence staining of IB4 (green) and DAPI (blue) in hearts of DMSO and 3PO mice at day 28 after MI (n=4; scale bar, 50  $\mu$ m). Data were expressed as mean  $\pm$  SEM. Data presented in (D) were analyzed by one-way ANOVA tests. Data presented in (E) were analyzed by the Mann-Whitney *U* test. NS indicates not significant. DMSO indicates Dimethylsulfoxide; 3PO, 3-(3-pyridinyl)-1-(4-pyridinyl)-2-propen-1-one; TUNEL, TdT-mediated dUTP Nick-End Labeling; IB4, isolectin B4; DAPI, 4',6-diamidino-2'-phenylindole dihydrochloride; and ROI, region of interest.

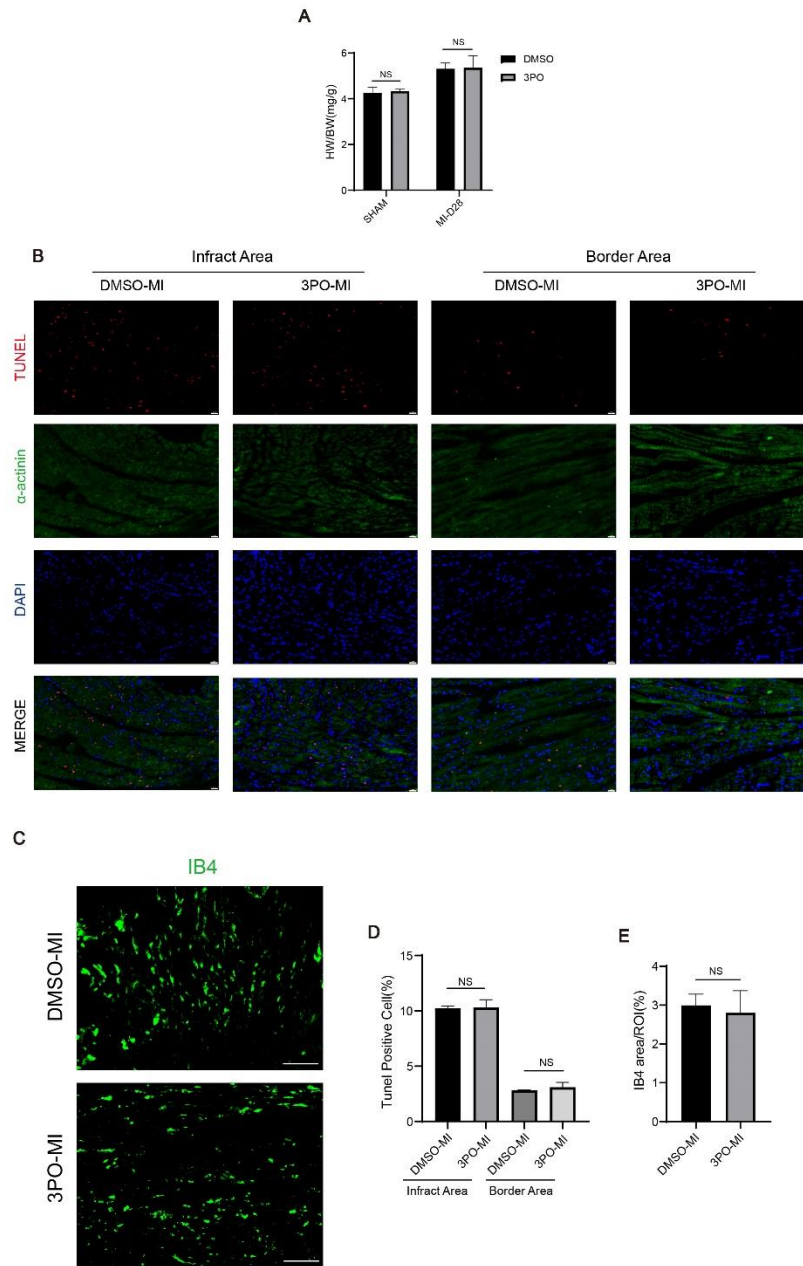

**Figure S2. 3PO has no influence on the abundance of neutrophils and myofibroblasts after MI.** (A) and (C) Representative immunofluorescence staining of Gr-1 (green) and DAPI (blue) in hearts of DMSO and 3PO mice at day 1 after MI (n=5; scale bar, 20  $\mu$ m). (B) and (D) Representative immunofluorescence staining of  $\alpha$ -SMA (green) and DAPI (blue) in hearts of DMSO and 3PO mice at day 28 after MI (n=6; scale bar, 50  $\mu$ m). Data were expressed as mean  $\pm$  SEM. Data presented in (C) and (D) were analyzed by the Mann-Whitney *U* test. NS indicates not significant. DMSO indicates Dimethylsulfoxide; 3PO, 3- (3-pyridinyl)-1- (4-pyridinyl)-2-propen-1-one;  $\alpha$ -SMA,  $\alpha$ -smooth muscle actin; and DAPI, 4',6-diamidino-2'-phenylindole dihydrochloride.

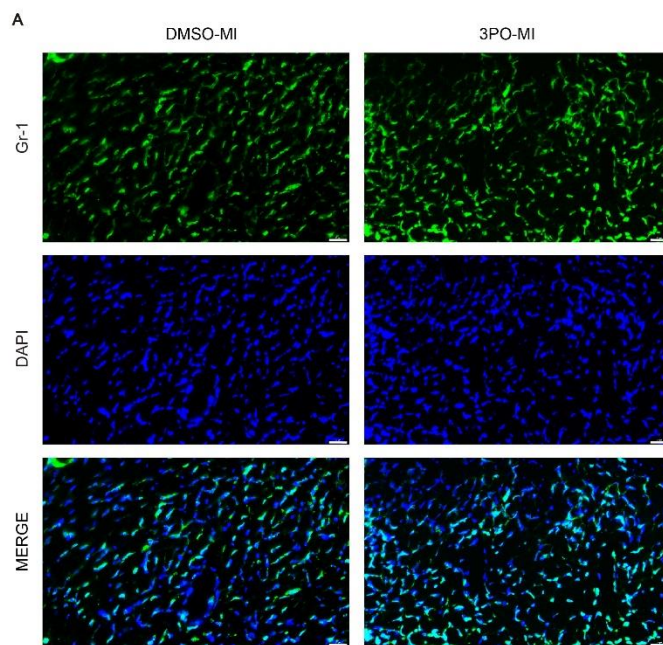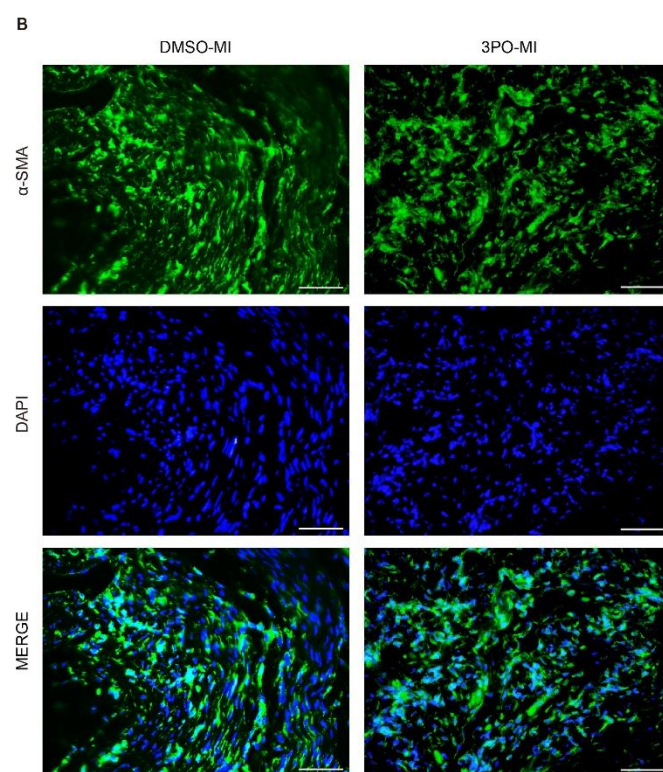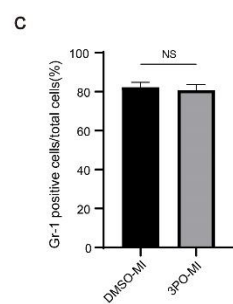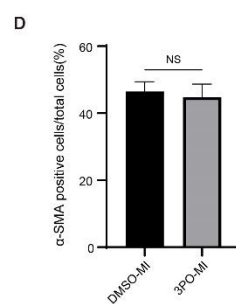

**Figure S3. Original membranes of western blotting analysis of PFKFB3 after MI.** Western Blotting membranes for PFKFB3 and GAPDH of murine hearts at day 1,3,7,14, and 28 after MI in both infarct and non-infarct areas. Total protein extracted from WT mice, n≥3 per group.

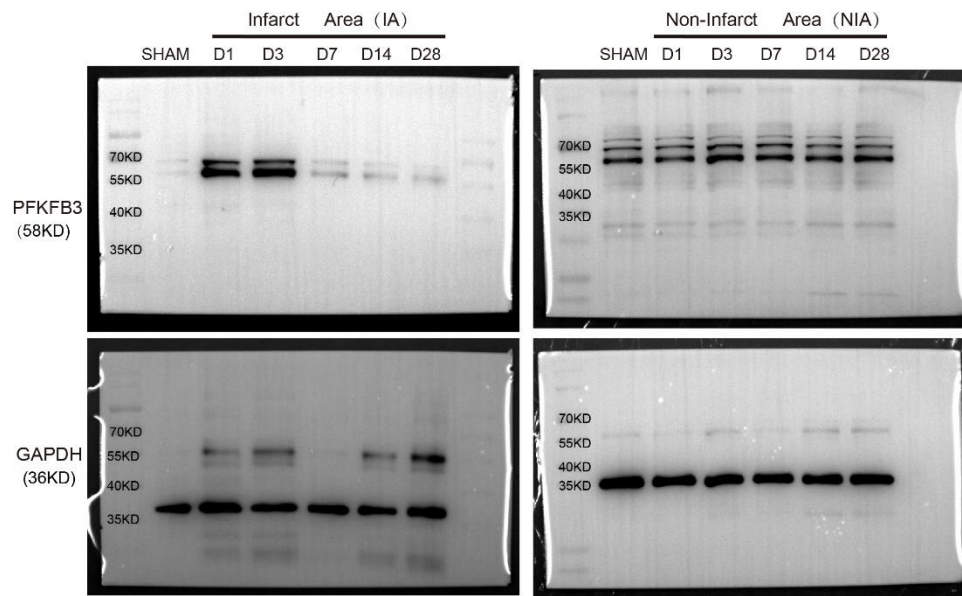

**Figure S4. Original membranes of western blotting analysis of PFKFB3, TGF- $\beta$ 1, SMAD2 phosphorylation, SMAD3 phosphorylation, and SMAD7 at day 3 after MI.** Western Blotting membranes for PFKFB3, TGF- $\beta$ 1, P-SMAD2, SAMD2, P-SMAD3, SMAD3, SMAD7, and GAPDH of murine hearts at day 3 after MI. Total protein extracted from DMSO and 3PO mice, n≥3 per group.

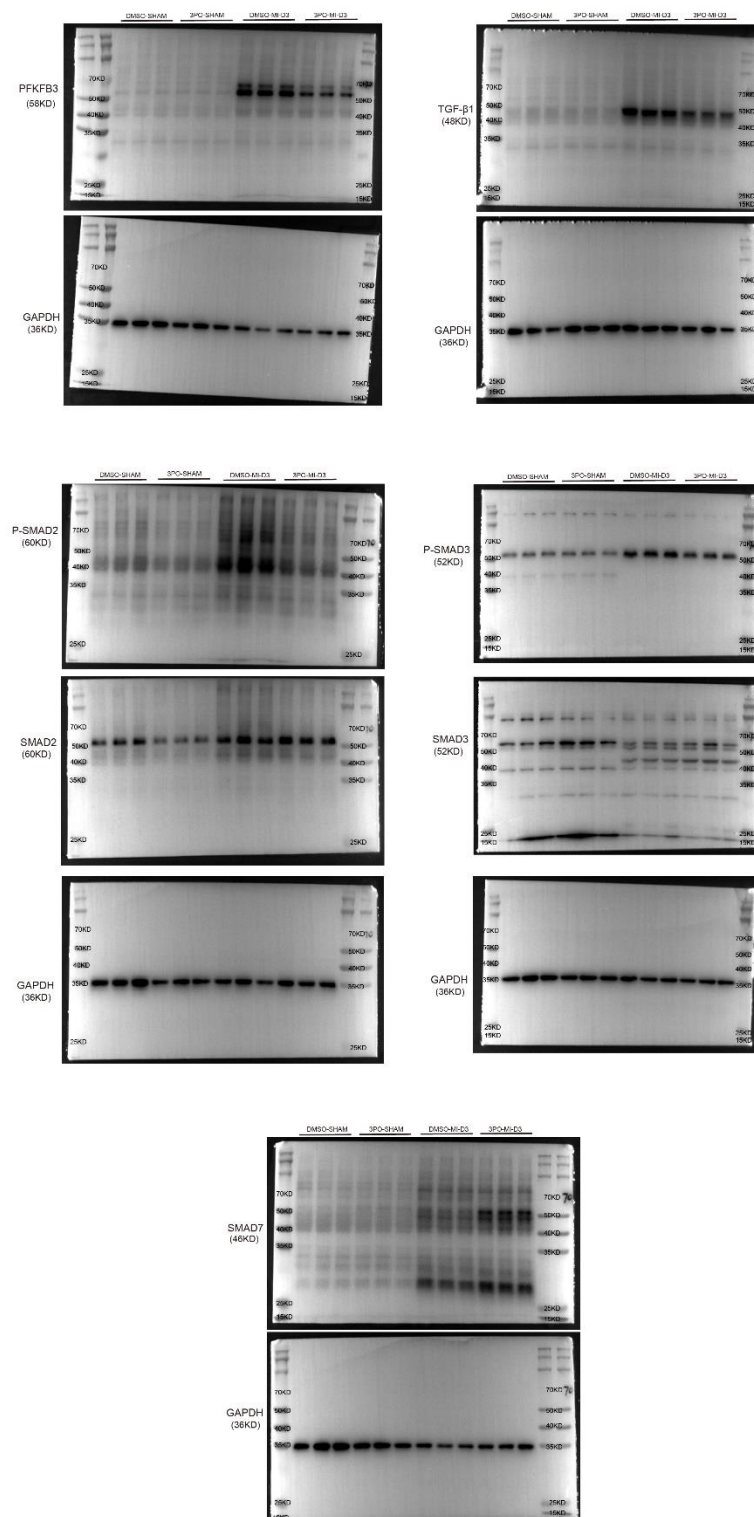

**Figure S5. Original membranes of western blotting analysis of PFKFB3 of Neonatal Rat Cardiac Fibroblasts(NRCFs) under hypoxia.** Western Blotting membranes on the left for PFKFB3 and GAPDH of NRCFs under hypoxia for 6, 12, and 24h, respectively. Western Blotting membranes on the right for PFKFB3 and GAPDH of NRCFs stimulated by DMSO or 3PO under hypoxia for 6h. Total protein



extracted from NRCFs, n≥3 per group.

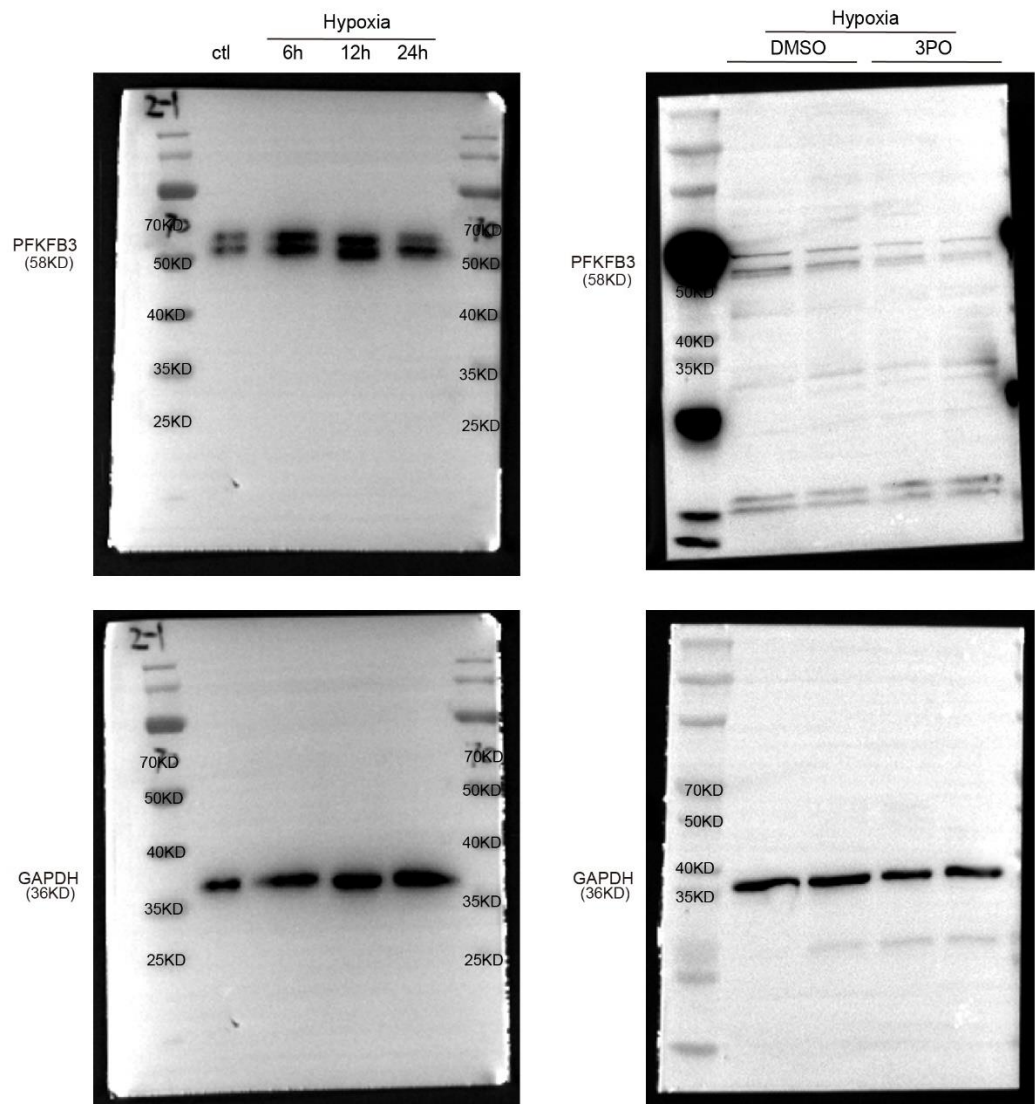

Supplement: s1 [file s1]
